# Supplementary material
Source: publisher figshare collection journal article supplement (https://sage.figshare.com/ndownloader/files/20045798)
Supplement: Supplementary file 1 [file 20045798]

## Supplementary Material

Table S1

*Severity Ranking Scheme for 11 Types of Violent-Behavioral Outcomes*

| <b>Severity Rank</b> | <b>Violence Perpetration</b>                              | <b>Violent Victimization</b>                              |
|----------------------|-----------------------------------------------------------|-----------------------------------------------------------|
| 11                   | I used a knife or gun on someone                          | Someone used a knife or gun on me                         |
| 10                   | I hit someone with a fist or object, or beat them up      | Someone hit me with a fist or object, or beat me up       |
| 9                    | I kicked, bit, or choked someone                          | Someone kicked, bit, or choked me                         |
| 8                    | I slapped someone                                         | Someone slapped me                                        |
| 7                    | I pushed, grabbed, or shoved some                         | Someone pushed, grabbed, or shoved me                     |
| 6                    | I threw an object at someone                              | Someone threw an object at me                             |
| 5                    | I tried to physically force someone to have sex           | Someone tried to physically force me to have sex          |
| 4                    | I threatened someone with a knife, gun, or other weapon   | Someone threatened me with a knife, gun, or other weapon  |
| 3                    | I threatened to harm someone, without any kind of weapon  | Someone threatened to harm me, without any kind of weapon |
| 2                    | I yelled or screamed at someone in a frightening way      | Someone yelled or scream at me in a frightening way       |
| 1                    | I did something made someone feel afraid for their safety | Someone did something made me feel afraid for my safety   |
| 0                    | No violence perpetration                                  | No violent victimization                                  |

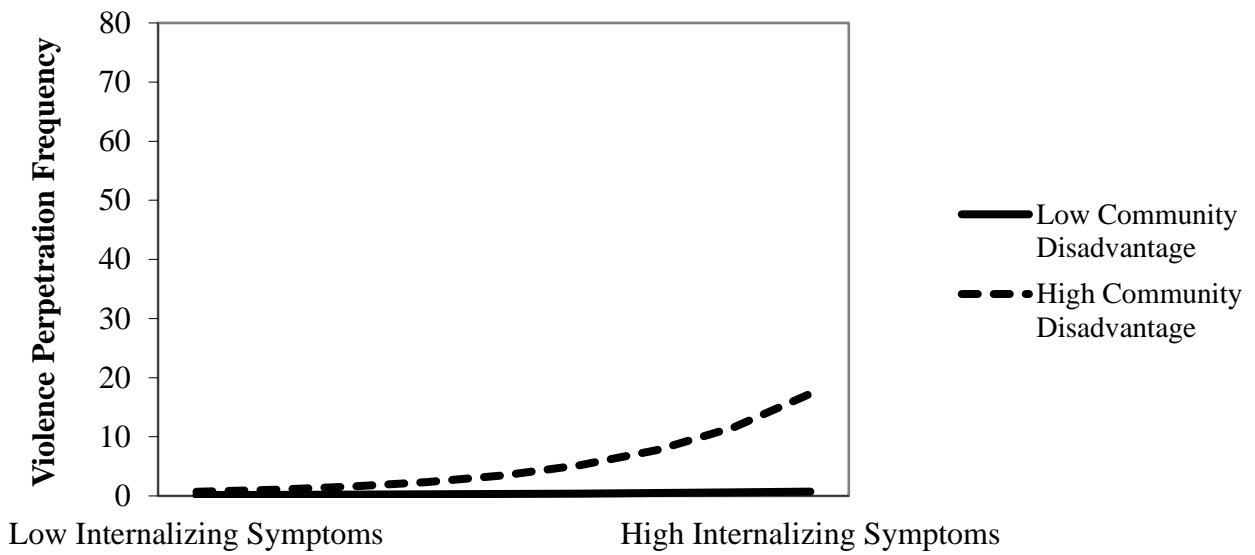

*Figure S1.* Plot of Significant Internalizing Symptoms x Community Disadvantage Interaction. Frequency of violence perpetration is plotted at low (-1 SD) and high (+1 SD) values of internalizing symptoms and community disadvantage.

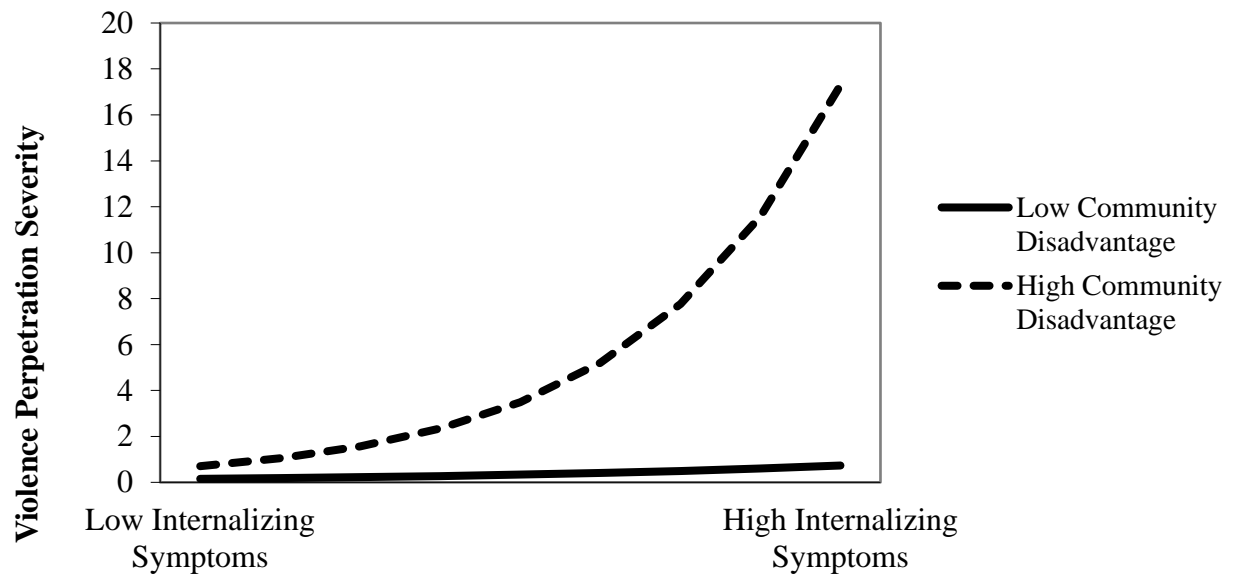

*Figure S2.* Plot of Significant Internalizing Symptoms x Community Disadvantage Interaction. Severity of violence perpetration is plotted at low (-1 SD) and high (+1 SD) values of internalizing symptoms and community disadvantage.

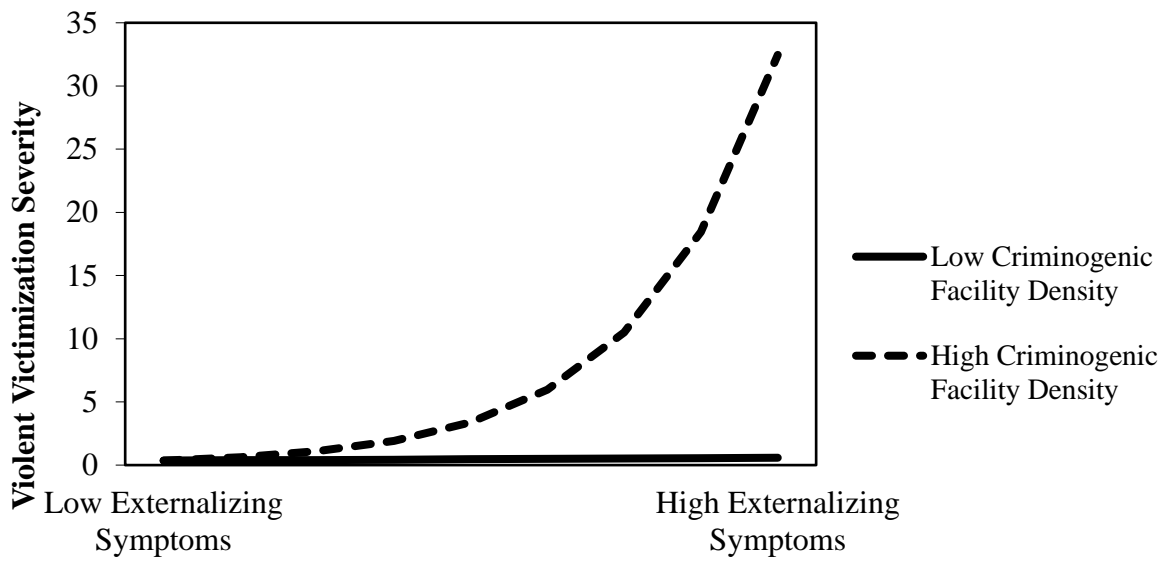

*Figure S3.* Plot of Significant Externalizing Symptoms x Criminogenic Facility Density Interaction. Frequency of violent victimization is plotted at low (-1 SD) and high (+1 SD) values of externalizing symptoms and criminogenic facility density.
